# Supplementary material for: Suppression of Akt-mTOR pathway rescued the social behavior in Cntnap2-deficient mice
Source: PubMed Central journal article supplement (PMC6395585; doi:10.1038/s41598-019-39434-5), 2019-02-28
Supplement: 41598_2019_39434_MOESM1_ESM.pdf [file 41598_2019_39434_MOESM1_ESM.pdf]

**Suppression of Akt-mTOR pathway rescued the social behavior in *Cntnap2*-deficient mice**

Xiaoliang Xing<sup>1,2,3,4</sup>, Jing Zhang<sup>1,3,4</sup>, Kunyang Wu<sup>1,3,4</sup>, Beibei Cao<sup>1,3,4</sup>, Xianfeng Li<sup>1,3,4</sup>,

Fang Jiang<sup>1,3,4</sup>, Zhengmao Hu<sup>1,4,5</sup>, Kun Xia<sup>1,4,5</sup>, Jia-Da Li<sup>1,3,4,5\*</sup>

**Supplementary table 1a**

**The list of 189 genes that were differentially expressed in the hippocampus of WT and *Cntnap2*<sup>-/-</sup> mice as analyzed by RNA-seq.**

| Gene          | Ratio (KO/WT) | P Value      | Gene Description                                  |
|---------------|---------------|--------------|---------------------------------------------------|
| Cntnap2       | 0.16          | 0.000        | contactin_associated_protein-like_2               |
| Alas2         | 0.44          | 0.000        | aminolevulinic_acid_synthase_2_erythroid          |
| Hbb-bt        | 0.55          | 0.000        | hemoglobin_beta_adult_t_chain                     |
| Ndn           | 0.58          | 0.000        | neccdin                                           |
| Rpl38-ps2     | 0.58          | 0.012        | ribosomal_protein_L38_pseudogene_2                |
| Ikzf5         | 0.59          | 0.001        | IKAROS_family_zinc_finger_5                       |
| <b>Col6a4</b> | <b>0.59</b>   | <b>0.018</b> | <b>collagen_type_VI_alpha_4</b>                   |
| Gvin1         | 0.60          | 0.003        | GTPase_very_large_interferon_inducible_1          |
| Myo1f         | 0.61          | 0.003        | myosin_IF                                         |
| Hbb-bs        | 0.63          | 0.000        | hemoglobin_beta_adult_s_chain                     |
| Klf2          | 0.63          | 0.003        | Kruppel-like_factor_2_(lung)                      |
| Hba-a1        | 0.63          | 0.000        | hemoglobin_alpha_adult_chain_1                    |
| Mki67         | 0.64          | 0.006        | antigen_identified_by_monoclonal_antibody_Ki_67   |
| Dynlt1b       | 0.64          | 0.005        | dynein_light_chain_Tctex-type_1B                  |
| Hba-a2        | 0.64          | 0.000        | hemoglobin_alpha_adult_chain_2                    |
| Gm27042       | 0.64          | 0.005        | predicted_gene_27042                              |
| <b>Cdkn1a</b> | <b>0.65</b>   | <b>0.007</b> | <b>cyclin-dependent_kinase_inhibitor_1A_(P21)</b> |
| Degs2         | 0.65          | 0.012        | delta(4)-desaturase_sphingolipid_2                |
| Gm42528       | 0.65          | 0.005        | predicted_gene_42528                              |

|               |             |              |                                                             |
|---------------|-------------|--------------|-------------------------------------------------------------|
| Gm3244        | 0.65        | 0.014        | predicted_pseudogene_3244                                   |
| Slfn5         | 0.65        | 0.009        | schlafen_5                                                  |
| Gm42608       | 0.65        | 0.015        | predicted_gene_42608                                        |
| Tfap4         | 0.65        | 0.009        | transcription_factor_AP4                                    |
| Esam          | 0.66        | 0.001        | endothelial_cell-specific_adhesion_molecule                 |
| Tmem181b-ps   | 0.67        | 0.000        | transmembrane_protein_181B_pseudogene                       |
| Eng           | 0.67        | 0.000        | endoglin                                                    |
| Chst9         | 0.67        | 0.016        | carbohydrate_(N-acetylgalactosamine_4-0)_sulfotransferase_9 |
| Zfp647        | 0.67        | 0.022        | zinc_finger_protein_647                                     |
| Btbd19        | 0.68        | 0.019        | BTB_(POZ)_domain_containing_19                              |
| <b>Flt4</b>   | <b>0.68</b> | <b>0.030</b> | <b>FMS-like_tyrosine_kinase_4</b>                           |
| Chrna5        | 0.68        | 0.007        | cholinergic_receptor_nicotinic_alpha_polypeptide_5          |
| Gm15751       | 0.68        | 0.030        | predicted_gene_15751                                        |
| Herc6         | 0.69        | 0.039        | hect_domain_and_RLD_6                                       |
| Filip11       | 0.69        | 0.021        | filamin_A_interacting_protein_1-like                        |
| Hspb1         | 0.69        | 0.035        | heat_shock_protein_1                                        |
| Ncf2          | 0.69        | 0.019        | neutrophil_cytosolic_factor_2                               |
| Serpinf1      | 0.69        | 0.013        | serine_(or_cysteine)_peptidase_inhibitor_clade_F_member_1   |
| Elf1          | 0.69        | 0.008        | E74-like_factor_1                                           |
| Tnfrsf12a     | 0.69        | 0.03         | tumor_necrosis_factor_receptor_superfamily_member_12a       |
| Prrg1         | 0.70        | 0.014        | proline_rich_Gla_(G-carboxyglutamic_acid)_1                 |
| C030034I22Rik | 0.70        | 0.040        | RIKEN_cDNA_C030034I22_gene                                  |
| Nudt8         | 0.70        | 0.032        | nudix_(nucleoside_diphosphate_linked_moiety_X)-type_motif_8 |
| Cenpq         | 0.70        | 0.026        | centromere_protein_Q                                        |
| Gm37111       | 0.70        | 0.041        | predicted_gene_37111                                        |

|               |             |              |                                                        |
|---------------|-------------|--------------|--------------------------------------------------------|
| Gm14418       | 0.70        | 0.047        | predicted_gene_14418                                   |
| Grem1         | 0.71        | 0.020        | gremlin_1_DAN_family_BMP_antagonist                    |
| Mcm3          | 0.71        | 0.044        | minichromosome_maintenance_deficient_3_(S._cerevisiae) |
| Gm2007        | 0.72        | 0.041        | predicted_gene_2007                                    |
| 1700024P16Rik | 0.72        | 0.049        | RIKEN_cDNA_1700024P16_gene                             |
| Il10ra        | 0.72        | 0.042        | interleukin_10_receptor_alpha                          |
| Mcts2         | 0.72        | 0.019        | malignant_T_cell_amplified_sequence_2                  |
| Pold4         | 0.73        | 0.023        | polymerase_(DNA-directed)_delta_4                      |
| 1190007I07Rik | 0.73        | 0.043        | RIKEN_cDNA_1190007I07_gene                             |
| 4921539H07Rik | 0.73        | 0.020        | RIKEN_cDNA_4921539H07_gene                             |
| Ndp           | 0.73        | 0.036        | Norrie_disease_(pseudoglioma)_ (human)                 |
| Gm16867       | 0.73        | 0.047        | predicted_gene_16867                                   |
| Ube2l6        | 0.73        | 0.040        | ubiquitin-conjugating_enzyme_E2L_6                     |
| Krt73         | 0.73        | 0.050        | keratin_73                                             |
| Rhobtb1       | 0.74        | 0.044        | Rho-related_BTBDomain_containing_1                     |
| Gal3st1       | 0.74        | 0.011        | galactose-3-O-sulfotransferase_1                       |
| Robo3         | 0.74        | 0.001        | roundabout_homolog_3_(Drosophila)                      |
| Usb1          | 0.74        | 0.042        | U6_snRNA_biogenesis_1                                  |
| Isoc2b        | 0.75        | 0.039        | isochorismatase_domain_containing_2b                   |
| Ica1          | 0.75        | 0.000        | islet_cell_autoantigen_1                               |
| Gm21967       | 0.75        | 0.009        | predicted_gene_21967                                   |
| <b>Ifnar2</b> | <b>0.75</b> | <b>0.013</b> | <b>interferon_(alpha_and_beta)_receptor_2</b>          |
| Zfp961        | 0.75        | 0.012        | zinc_finger_protein_961                                |
| Trdmt1        | 0.75        | 0.044        | tRNA_aspartic_acid_methyltransferase_1                 |
| Fcgr1g        | 0.75        | 0.041        | Fc_receptor_IgE_high_affinity_I_gamma_polypeptide      |
| Lyn           | 0.75        | 0.031        | Yamaguchi_sarcoma_viral_(v-yes-1)_oncogene_homolog     |
| Gm43843       | 0.75        | 0.031        | predicted_gene_43843                                   |

|               |      |       |                                                                                        |
|---------------|------|-------|----------------------------------------------------------------------------------------|
| Kif26a        | 0.76 | 0.036 | kinesin_family_member_26A                                                              |
| Matn4         | 0.76 | 0.021 | matrilin_4                                                                             |
| Rmdn1         | 0.77 | 0.035 | regulator_of_microtubule_dynamics_1                                                    |
| Fam109a       | 0.77 | 0.030 | family_with_sequence_similarity_109_member_A                                           |
| Apln          | 0.77 | 0.007 | apelin                                                                                 |
| Akr1b10       | 0.77 | 0.018 | aldo-keto_reductase_family_1_member_B10_(aldose_reductase)                             |
| Lysmd1        | 0.77 | 0.038 | LysM_putative_peptidoglycan-binding_domain_containing_1                                |
| Dnajc28       | 0.78 | 0.032 | DnaJ_heat_shock_protein_family_(Hsp40)_member_C28                                      |
| Lct           | 0.78 | 0.002 | lactase                                                                                |
| Gm15542       | 0.78 | 0.037 | predicted_gene_15542                                                                   |
| Dusp28        | 0.78 | 0.017 | dual_specificity_phosphatase_28                                                        |
| Cbx8          | 0.78 | 0.039 | chromobox_8                                                                            |
| Gpt           | 0.79 | 0.031 | glutamic_pyruvic_transaminase_soluble                                                  |
| Pon2          | 0.79 | 0.001 | paraoxonase_2                                                                          |
| Pot1a         | 0.79 | 0.048 | protection_of_telomeres_1A                                                             |
| 4930453N24Rik | 0.79 | 0.007 | RIKEN_cDNA_4930453N24_gene                                                             |
| Bbip1         | 0.80 | 0.010 | BBSome_interacting_protein_1                                                           |
| Entpd1        | 0.80 | 0.047 | ectonucleoside_triphosphate_diphosphohydrolase_1                                       |
| Mobp          | 0.80 | 0.006 | myelin-associated_oligodendrocytic_basic_protein                                       |
| Fzd3          | 1.20 | 0.023 | frizzled_class_receptor_3                                                              |
| Asns          | 1.20 | 0.000 | asparagine_synthetase                                                                  |
| Ctdspl2       | 1.20 | 0.028 | CTD_(carboxy-terminal_domain_RNA_polymerase_II_polypeptide_A)_small_phosphatase_like_2 |
| Zcchc12       | 1.20 | 0.014 | zinc_finger_CCHC_domain_containing_12                                                  |
| Pisd-ps1      | 1.20 | 0.039 | phosphatidylserine_decarboxylase_pseudogene_1                                          |
| 1110032A03Rik | 1.21 | 0.017 | RIKEN_cDNA_1110032A03_gene                                                             |

|                |             |              |                                                                                                               |
|----------------|-------------|--------------|---------------------------------------------------------------------------------------------------------------|
| Trmt112        | 1.21        | 0.020        | tRNA_methyltransferase_11-2                                                                                   |
| Acot9          | 1.22        | 0.041        | acyl-CoA_thioesterase_9                                                                                       |
| RP23-407N2.2   | 1.22        | 0.028        | NA                                                                                                            |
| Snx7           | 1.23        | 0.041        | sorting_nexin_7                                                                                               |
| Mest           | 1.23        | 0.038        | mesoderm_specific_transcript                                                                                  |
| Commd1         | 1.23        | 0.022        | COMM_domain_containing_1                                                                                      |
| Arfgef3        | 1.23        | 0.000        | ARFGEF_family_member_3                                                                                        |
| Unc5d          | 1.23        | 0.012        | unc-5_homolog_D_(C._elegans)                                                                                  |
| Prkra          | 1.23        | 0.047        | protein_kinase_interferon_inducible_double_stranded_RNA_dependent_activator                                   |
| Dcn            | 1.23        | 0.035        | decorin                                                                                                       |
| Htra2          | 1.23        | 0.037        | HtrA_serine_peptidase_2                                                                                       |
| Slc9a7         | 1.24        | 0.019        | solute_carrier_family_9_(sodium/hydrogen_exchanger)_member_7                                                  |
| Usp35          | 1.24        | 0.011        | ubiquitin_specific_peptidase_35                                                                               |
| Chst8          | 1.25        | 0.019        | carbohydrate_(N-acetylgalactosamine_4-0)_sulfotransferase_8                                                   |
| Rps4l          | 1.25        | 0.019        | ribosomal_protein_S4-like                                                                                     |
| Sema4b         | 1.26        | 0.025        | sema_domain_immunoglobulin_domain_(Ig)_transmembrane_domain_(TM)_and_short_cytoplasmic_domain_(semaphorin)_4B |
| Smo            | 1.26        | 0.015        | smoothened_frizzled_class_receptor                                                                            |
| Engase         | 1.26        | 0.037        | endo-beta-N-acetylglucosaminidase                                                                             |
| Thsd7b         | 1.26        | 0.031        | thrombospondin_type_I_domain_containing_7B                                                                    |
| Btbd11         | 1.27        | 0.015        | kelch_repeat_and_BTB_(POZ)_domain_containing_11                                                               |
| Rnaset2b       | 1.27        | 0.027        | ribonuclease_T2B                                                                                              |
| <b>Ppp2r3d</b> | <b>1.28</b> | <b>0.006</b> | <b>protein_phosphatase_2_(formerly_2A)_regulatory_subunit_B''_delta</b>                                       |
| Cdyl           | 1.28        | 0.042        | chromodomain_protein_Y_chromosome-like                                                                        |

|               |             |              |                                                                              |
|---------------|-------------|--------------|------------------------------------------------------------------------------|
| Strip2        | 1.28        | 0.020        | striatin_interacting_protein_2                                               |
| Wdr6          | 1.29        | 0.000        | WD_repeat_domain_6                                                           |
| Amd2          | 1.30        | 0.005        | S-adenosylmethionine_decarboxylase_2                                         |
| Rbm3          | 1.30        | 0.000        | RNA_binding_motif_protein_3                                                  |
| Zfp830        | 1.30        | 0.025        | zinc_finger_protein_830                                                      |
| C2cd4c        | 1.31        | 0.035        | C2_calcium-dependent_domain_containing_4C                                    |
| <b>Col6a1</b> | <b>1.31</b> | <b>0.008</b> | <b>collagen_type_VI_alpha_1</b>                                              |
| Rbm11         | 1.31        | 0.038        | RNA_binding_motif_protein_11                                                 |
| Npr3          | 1.32        | 0.003        | natriuretic_peptide_receptor_3                                               |
| Cirbp         | 1.33        | 0.000        | cold_inducible_RNA_binding_protein                                           |
| Pafah1b3      | 1.34        | 0.030        | platelet-activating_factor_acetylhydrolase_isoform_1b_subunit_3              |
| Grm8          | 1.34        | 0.043        | glutamate_receptor_metabotropic_8                                            |
| Zfp11         | 1.34        | 0.042        | zinc_finger_protein_11                                                       |
| Slc7a3        | 1.35        | 0.038        | solute_carrier_family_7_(cationic_amino_acid_transporter_y+_system)_member_3 |
| Gm13292       | 1.35        | 0.029        | predicted_gene_13292                                                         |
| Pdp2          | 1.35        | 0.032        | pyruvate_dehydrogenase_phosphatase_catalytic_subunit_2                       |
| Scn7a         | 1.36        | 0.050        | sodium_channel_voltage-gated_type_VII_alpha                                  |
| Umad1         | 1.36        | 0.000        | UMAP1-MVP12_associated_(UMA)_domain_containing_1                             |
| <b>Efna5</b>  | <b>1.36</b> | <b>0.041</b> | <b>ephrin_A5</b>                                                             |
| Htatip2       | 1.37        | 0.022        | HIV-1_Tat_interactive_protein_2                                              |
| Klhl36        | 1.37        | 0.031        | kelch-like_36                                                                |
| RP23-54G8.4   | 1.37        | 0.047        | NA                                                                           |
| Fam71e1       | 1.37        | 0.043        | family_with_sequence_similarity_71_member_E1                                 |
| Setmar        | 1.39        | 0.037        | SET_domain_without_mariner_transposase_fusion                                |
| Pcdhgb4       | 1.39        | 0.046        | protocadherin_gamma_subfamily_B_4                                            |

|               |      |       |                                                                     |
|---------------|------|-------|---------------------------------------------------------------------|
| Kcnq4         | 1.39 | 0.024 | potassium_voltage-gated_channel_subfamily_Q_member_4                |
| Plcx3         | 1.41 | 0.026 | phosphatidylinositol-specific_phospholipase_C_X_domain_containing_3 |
| Xaf1          | 1.41 | 0.040 | XIAP_associated_factor_1                                            |
| Tpbp          | 1.41 | 0.031 | trophoblast_glycoprotein                                            |
| Rom1          | 1.42 | 0.024 | rod_outer_segment_membrane_protein_1                                |
| Pcdhb15       | 1.42 | 0.043 | protocadherin_beta_15                                               |
| Kcnh5         | 1.42 | 0.049 | potassium_voltage-gated_channel_subfamily_H_(eag-related)_member_5  |
| Gm9531        | 1.43 | 0.048 | predicted_gene_9531                                                 |
| Gm9987        | 1.43 | 0.040 | predicted_gene_9987                                                 |
| Akna          | 1.43 | 0.018 | AT-hook_transcription_factor                                        |
| Crb2          | 1.43 | 0.036 | crumbs_family_member_2                                              |
| Gm37874       | 1.43 | 0.036 | predicted_gene_37874                                                |
| Kcnu1         | 1.44 | 0.035 | potassium_channel_subfamily_U_member_1                              |
| Lox11         | 1.45 | 0.030 | lysyl_oxidase-like_1                                                |
| Dnph1         | 1.45 | 0.032 | 2'-deoxynucleoside_5'-phosphate_N-hydrolase_1                       |
| Fam69c        | 1.45 | 0.013 | family_with_sequence_similarity_69_member_C                         |
| Rps10-ps2     | 1.45 | 0.027 | ribosomal_protein_S10_pseudogene_2                                  |
| Krt9          | 1.45 | 0.001 | keratin_9                                                           |
| Gm37034       | 1.47 | 0.032 | predicted_gene_37034                                                |
| Abcb4         | 1.47 | 0.008 | ATP-binding_cassette_sub-family_B_(MDR/TAP)_member_4                |
| Tha1          | 1.47 | 0.021 | threonine_aldolase_1                                                |
| Hfm1          | 1.47 | 0.046 | HFM1_ATP-dependent_DNA_helicase_homolog                             |
| C1qtnf6       | 1.48 | 0.036 | C1q_and_tumor_necrosis_factor_related_protein_6                     |
| Gcnt1         | 1.48 | 0.026 | glucosaminyl_(N-acetyl)_transferase_1_core_2                        |
| 4632427E13Rik | 1.48 | 0.021 | RIKEN_cDNA_4632427E13_gene                                          |

|               |             |              |                                                                                               |
|---------------|-------------|--------------|-----------------------------------------------------------------------------------------------|
| Aim2          | 1.48        | 0.025        | absent_in_melanoma_2                                                                          |
| Pcdhga8       | 1.48        | 0.002        | protocadherin_gamma_subfamily_A_8                                                             |
| Fdxacb1       | 1.48        | 0.029        | ferredoxin-fold_anticodon_binding_domain_containing_1                                         |
| Adamts15      | 1.48        | 0.031        | a_disintegrin-like_and_metallopeptidase_(reprolysin_type)_with_thrombospondin_type_1_motif_15 |
| Kcne11        | 1.49        | 0.020        | potassium_voltage-gated_channel_Isk-related_family_member_1-like_pseudogene                   |
| Spag5         | 1.49        | 0.008        | sperm_associated_antigen_5                                                                    |
| Gm9762        | 1.50        | 0.020        | predicted_pseudogene_9762                                                                     |
| Tfr2          | 1.51        | 0.017        | transferrin_receptor_2                                                                        |
| <b>Col4a5</b> | <b>1.51</b> | <b>0.019</b> | <b>collagen_type_IV_alpha_5</b>                                                               |
| Pcdhgb7       | 1.52        | 0.009        | protocadherin_gamma_subfamily_B_7                                                             |
| <b>Met</b>    | <b>1.55</b> | <b>0.012</b> | <b>met_proto-oncogene</b>                                                                     |
| Baiap3        | 1.55        | 0.020        | BAI1-associated_protein_3                                                                     |
| Gm12183       | 1.56        | 0.011        | predicted_gene_12183                                                                          |
| Gm14964       | 1.56        | 0.010        | predicted_gene_14964                                                                          |
| Bace2         | 1.57        | 0.013        | beta-site_APP-cleaving_enzyme_2                                                               |
| Scnn1a        | 1.57        | 0.002        | sodium_channel_nonvoltage-gated_1_alpha                                                       |
| Pcdhb5        | 1.58        | 0.008        | protocadherin_beta_5                                                                          |
| Pygl          | 1.61        | 0.003        | liver_glycogen_phosphorylase                                                                  |
| Pdk4          | 1.64        | 0.007        | pyruvate_dehydrogenase_kinase_isoenzyme_4                                                     |
| Htra3         | 1.75        | 0.001        | HtrA_serine_peptidase_3                                                                       |

\*The genes in the PI3K-Akt signaling pathway were highlighted.



## Supplementary Figure 1d

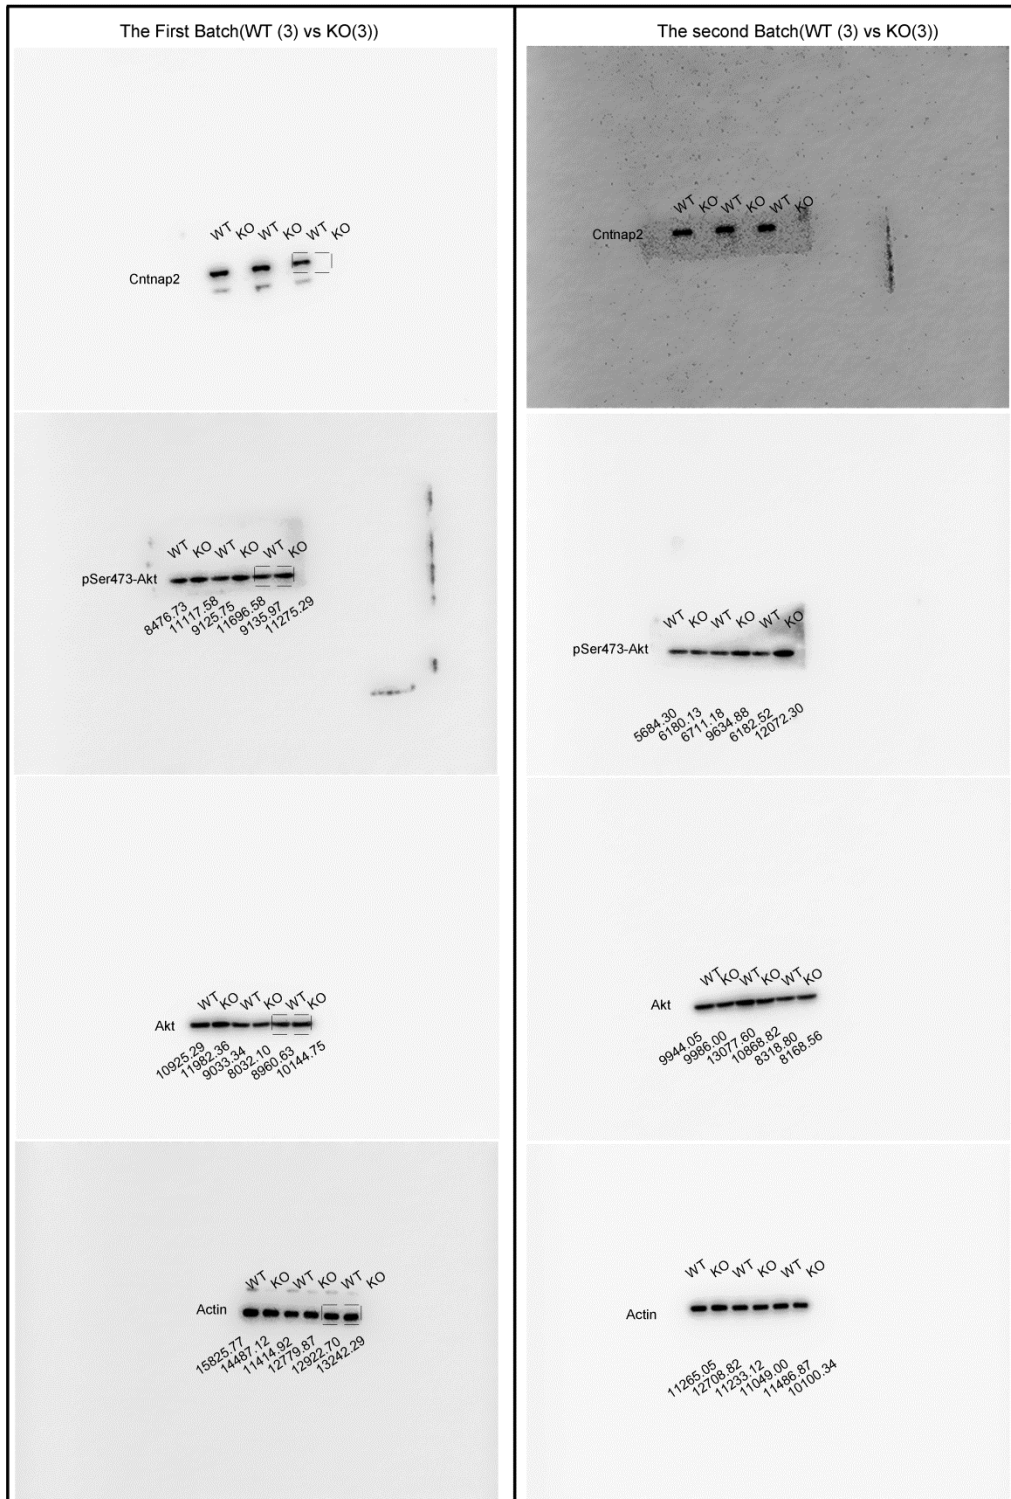

Fig. 1d. The uncropped Western blot images of Cntnap2, pSer473-Akt, Akt and Actin from the hippocampus of 6 WT and 6 Cntnap2<sup>-/-</sup> mice. The boxed images were shown in Figure 1d. The band density was quantified using ImageJ software, and the

scores were listed at the bottom of respective bands.

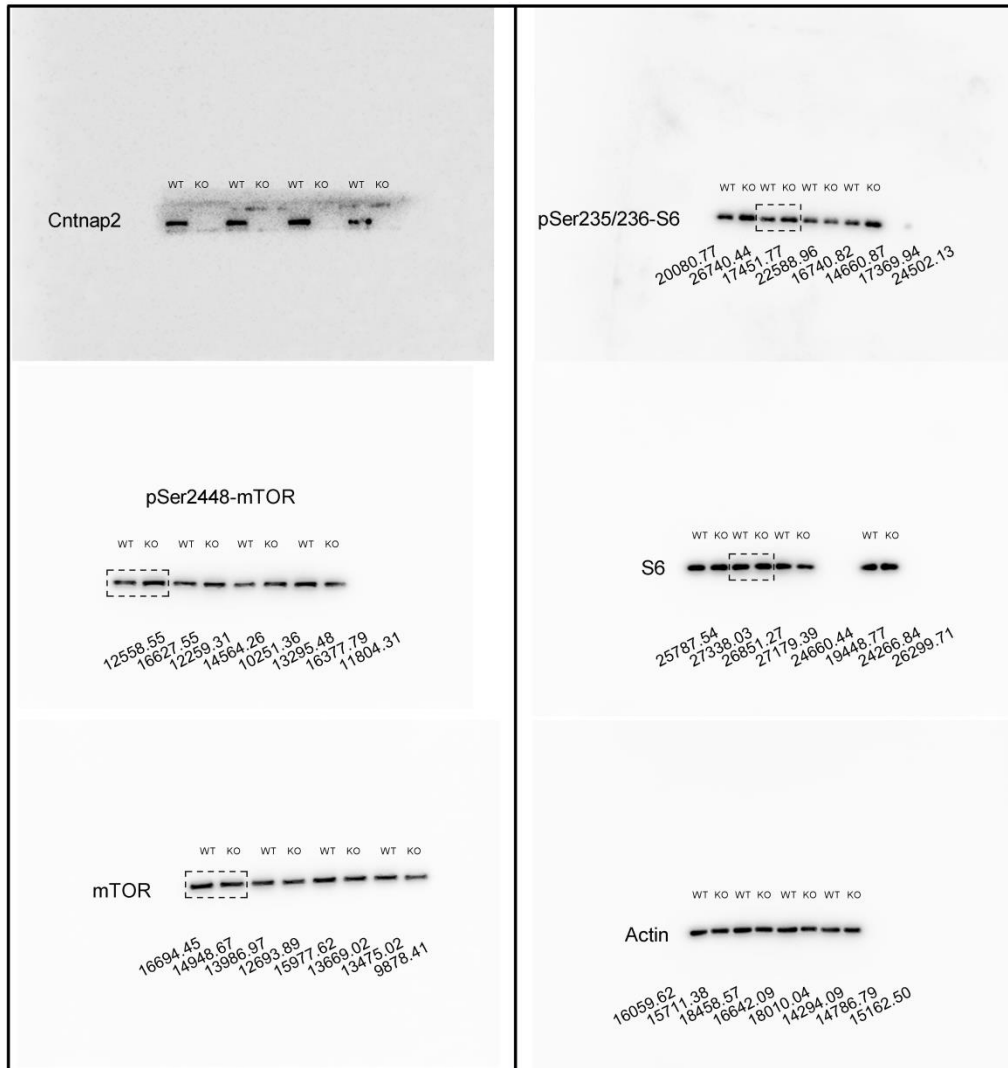

Fig. 1d. The uncropped Western blot images of Cntnap2, pSer2448-mTOR, mTOR, pSer235/236-S6, S6 and Actin from the hippocampus of 4 WT and 4 Cntnap2<sup>-/-</sup> mice. The boxed images were shown in Figure 1d. The band density was quantified using ImageJ software, and the scores were listed at the bottom of respective bands.

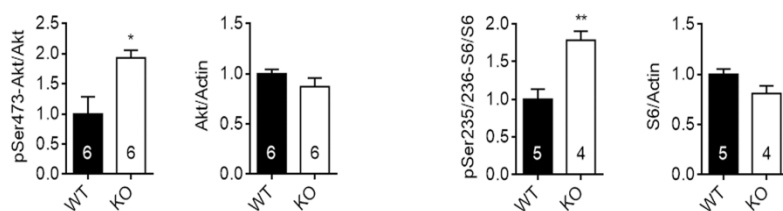

Fig. 1d. Quantification of lysates from the cortex of WT and Cntnap2<sup>-/-</sup> mice in

Akt-mTOR signaling pathway. \* $p < 0.05$ , \*\* $p < 0.01$ . Data are expressed as the mean  $\pm$  sem, unpaired two-tail Student's  $t$  test. The uncropped Western blot images of Cntnap2, pSer473-Akt, Akt, pSer235/236-S6, S6 and Actin were provided below.

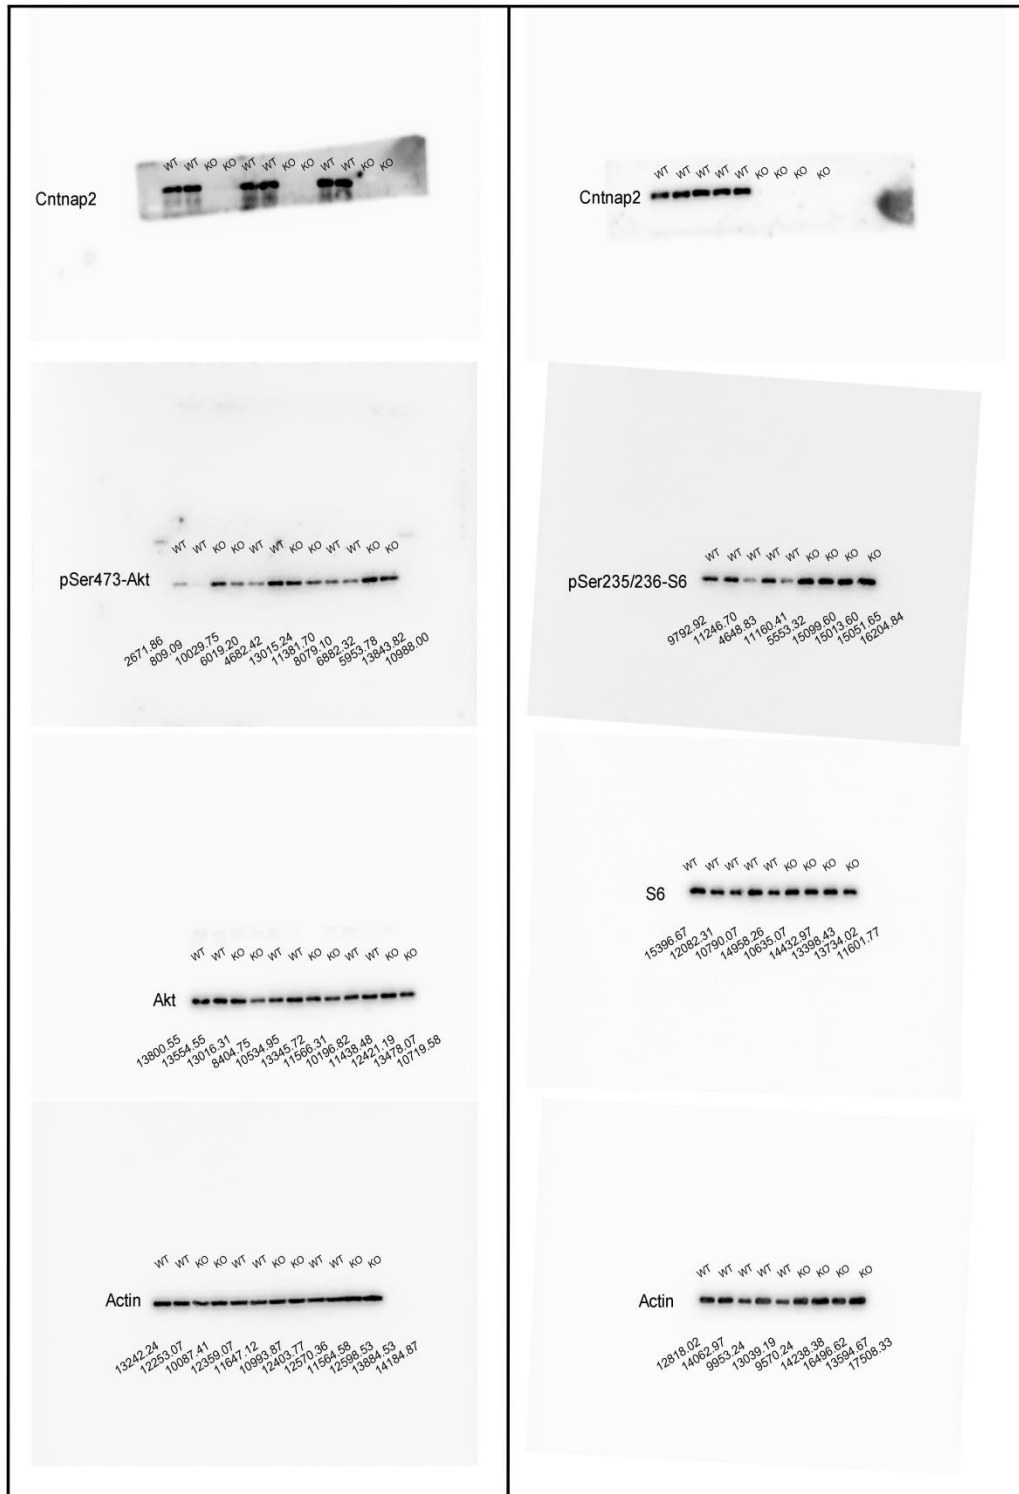

Fig. 1d. The uncropped Western blot images of Cntnap2, pSer473-Akt, Akt, pSer235/236-S6, S6 and Actin from the cortex of WT and Cntnap2<sup>-/-</sup> mice. 6 WT and 6 Cntnap2<sup>-/-</sup> mice for Cntnap2, pSer473-Akt, Akt and Actin. 5 WT and 4 Cntnap2<sup>-/-</sup> mice for Cntnap2, pSer235/236-S6, S6 and Actin. The band density was quantified using ImageJ software, and the scores were listed at the bottom of respective bands.

### Supplementary Figure. 2b

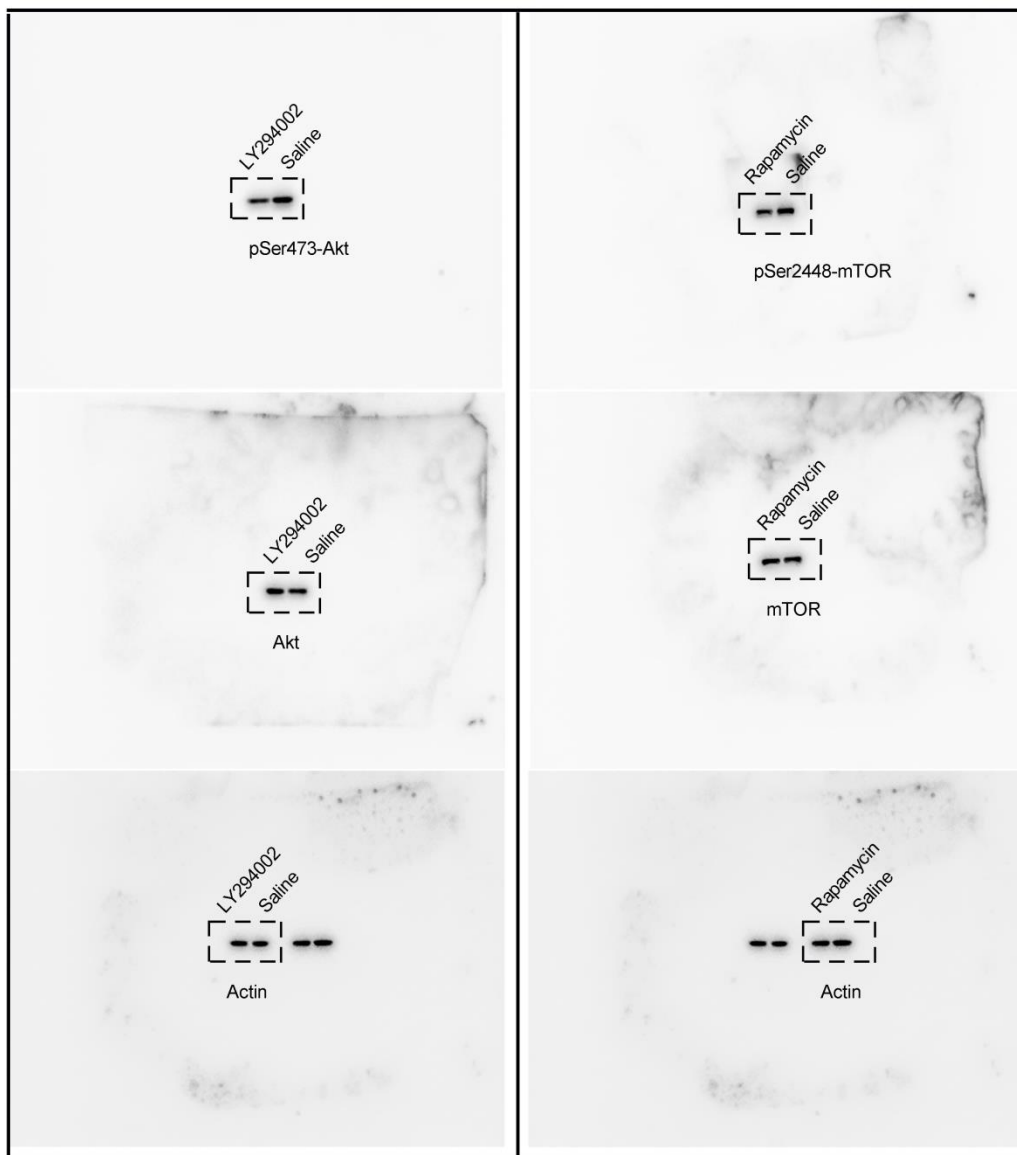

Fig. 2b The uncropped Western blot images of pSer473-Akt, Akt, pSer2448-mTOR, mTOR and Actin from the hippocampus of WT mice after 60 min of the second

injection with LY294002 or rapamycin respectively. The boxed images were shown in Figure 2b.
